# Supplementary material for: A high-throughput methodology for the efficient isolation of highly pure extracellular vesicles from skeletal muscle myoblasts
Source: Research Square preprint supplement (doi:10.21203/rs.3.rs-2041930/v1), 2022-09-12
Supplement: Supplementary file 1 [file 2e4c9627f18db65face57179.docx]

# A high-throughput methodology for the efficient isolation of highly pure extracellular vesicles from skeletal muscle myoblasts

María Fernández-Rhodes1, Bahman Adlou1, Soraya Williams1, Aveen R. Jalal1, Mark P. Lewis1, Owen G. Davies1

1 School of Sports, Health and Exercise Sciences, Loughborough University, Loughborough, Leicestershire, UK

Corresponding author: o.g.davies@lboro.ac.uk

# **SUPPLEMENTARY FIGURES**


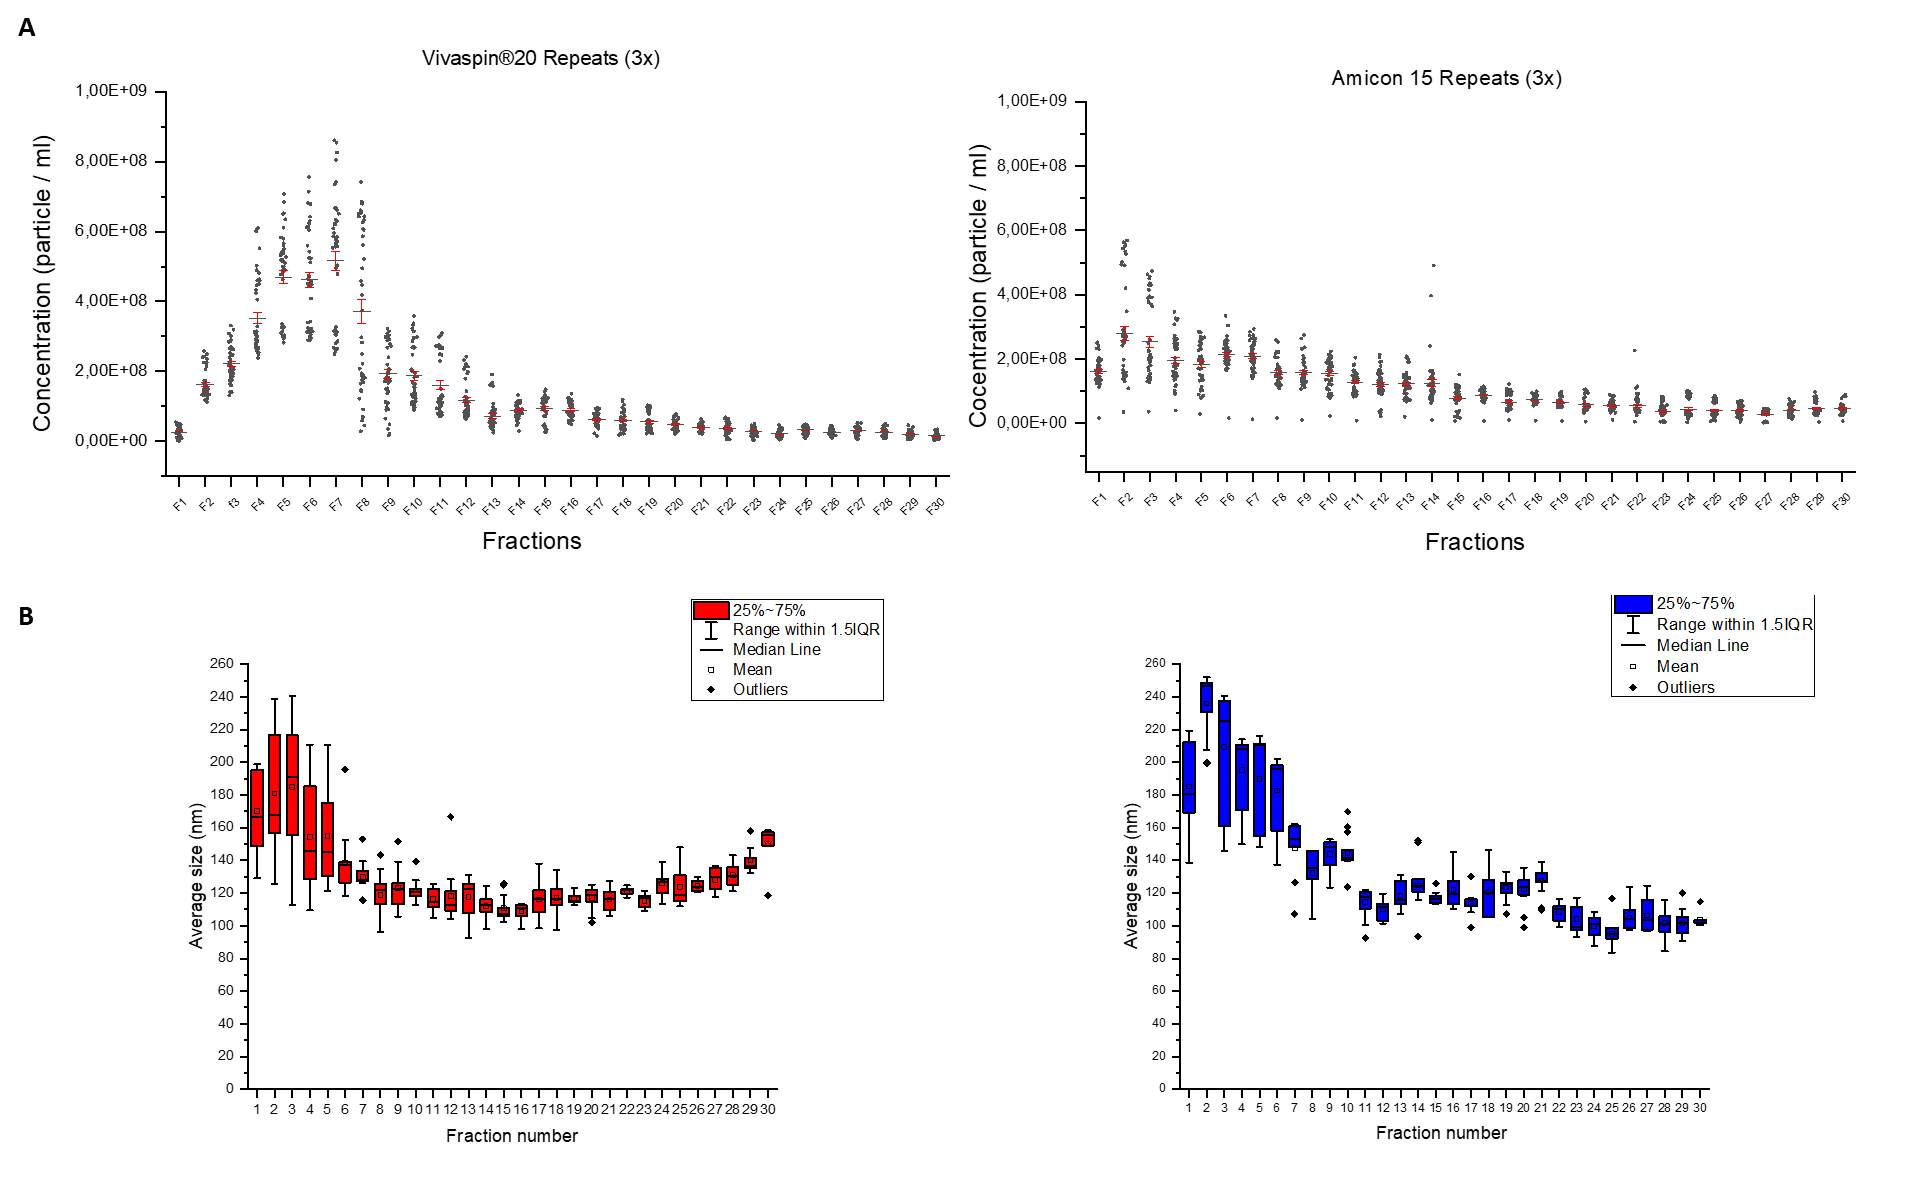


**Supplementary Figure 1: Supplementary analysis on the individual 30 fractions after SEC isolation. (A) Grouped dot plot of 45 particle concentrations per fraction (15 x 3 repeats) between Vivaspin and Amicon.**  Vivaspin fractions =<14: 2.43E+08 ± 6.35E+07 and fractions >=15: 4.27E+07 ± 8.08E+06. Amicon fractions =<14: 1.76E+08 ± 3.45E+07 and fractions >=15: 5.39E+07 ± 6.40E+06. **(B) Target fractions size distributions for each filter.** Amicon (red) and Vivaspin (blue) Amicon average size distribution: 158.15 ± 19.33 nm vs. Vivaspin’s 163.41 ± 30.12 nm.


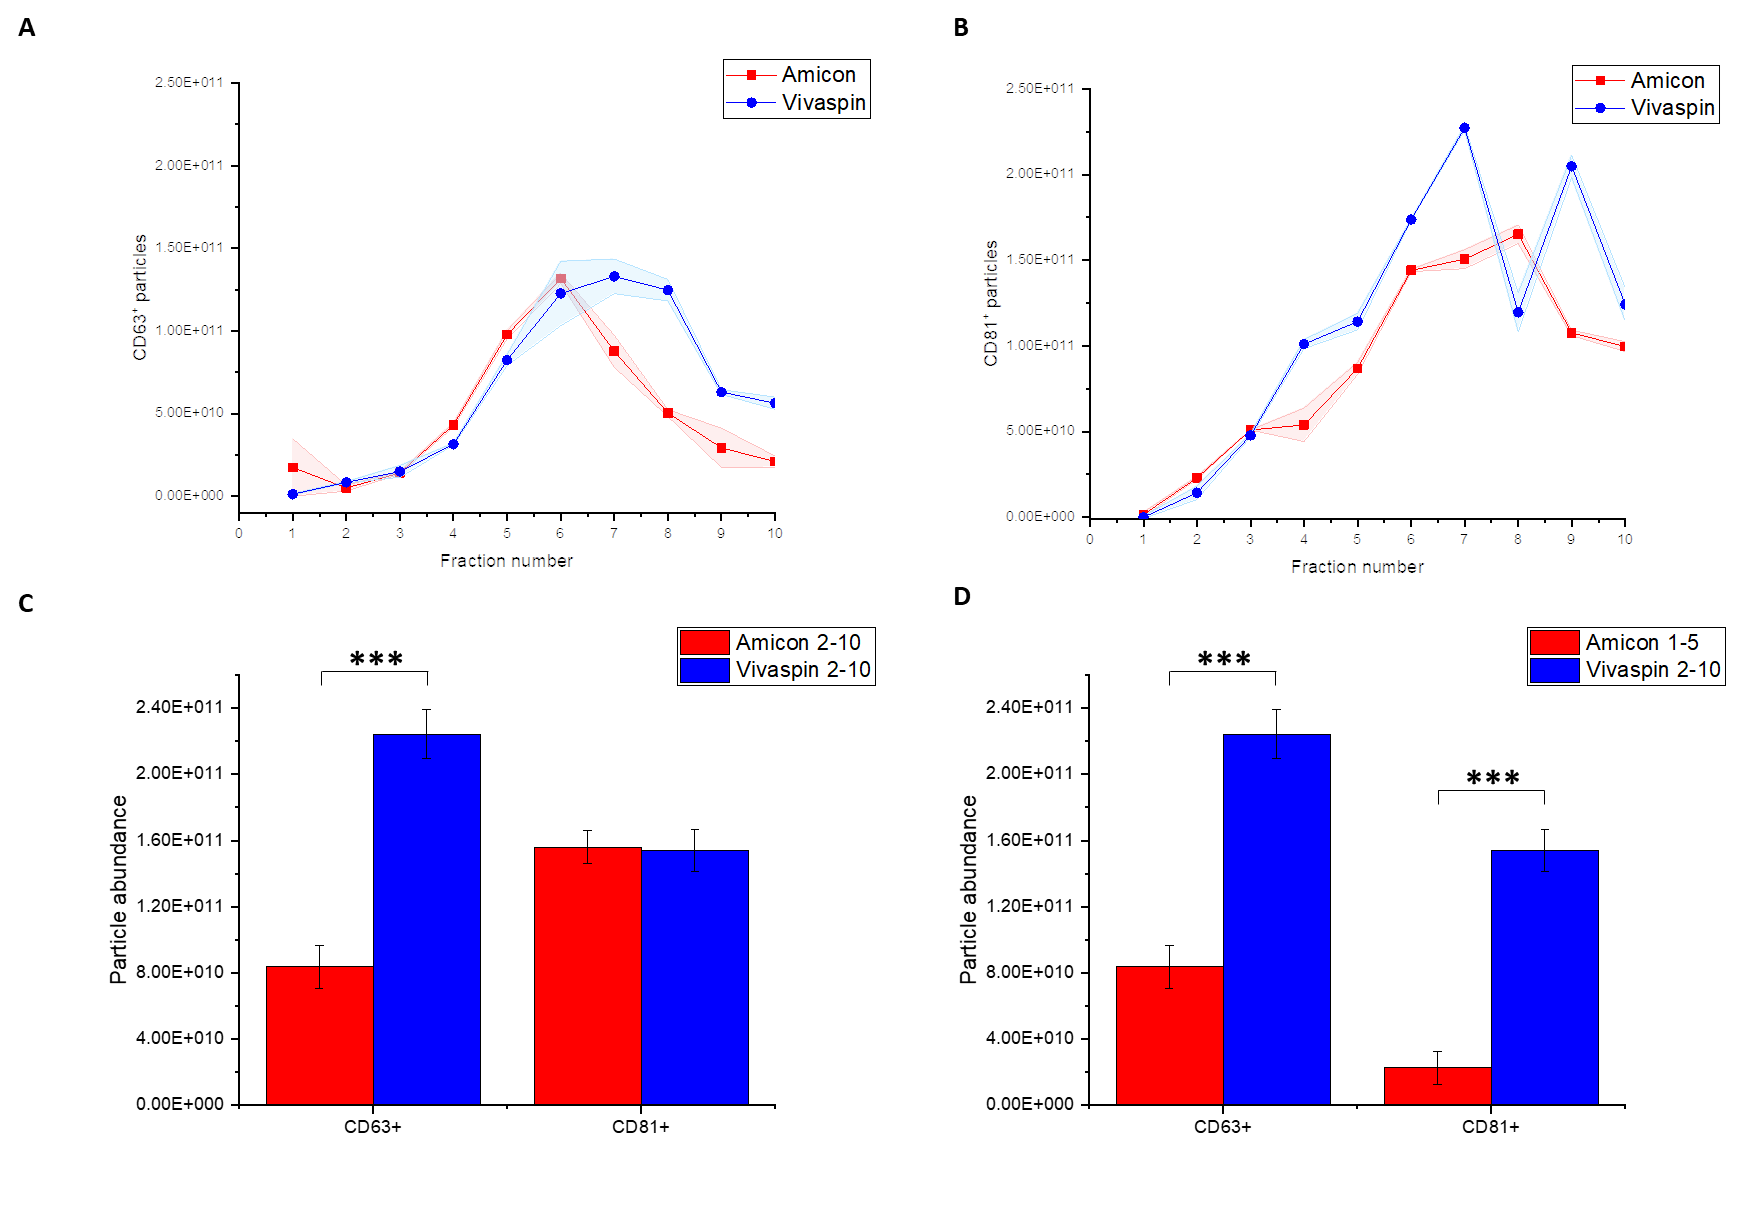


**Supplementary Figure 2:** **ExoELISA analysis.** (A) Presence of CD63+ particles in Amicon (red) and Vivaspin (blue) over fractions 1 to 10 (B) Presence of CD81+ particles in Amicon (red) and Vivaspin (blue) over fractions 1 to 10 (C) CD63+ and CD81+ particle abundance in final preparations after Amicon or Vivaspin pre-concentration, combining fractions 2 to 10 (D) Presence of CD81+ particles in Amicon (red) and Vivaspin (blue) over fractions 1 to 10 (C) CD63+ and CD81+ particle abundance in final preparations after combining fractions 1 to 5 after Amicon pre-concentration and fractions 2 to 10 after Vivaspin pre-concentration ( ***;p<0.001).


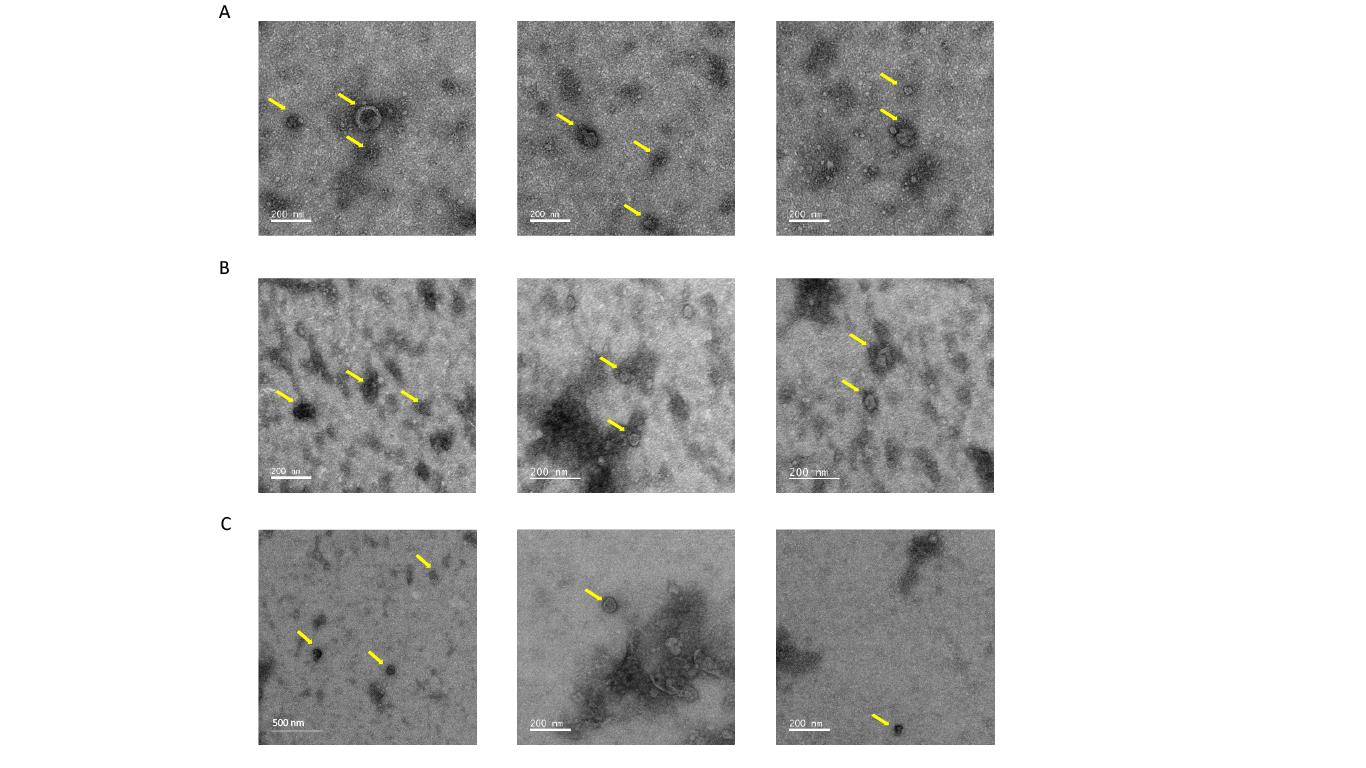


**Supplementary Figure 3: TEM images of SM-EV collected after different UF+SEC protocols.** (A) Images panel for samples obtained after Amicon UF formed by fractions 2-10 (B) Images panel for samples obtained after Vivaspin UF formed by fractions 2-10 (C) Images panel for samples obtained after Amicon UF formed by fractions 1-5.
